# Supplementary material for: Simulation-based clinical systems testing for healthcare spaces: from intake through implementation
Source: Adv Simul (Lond). 2019 Aug 2;4:19. doi: 10.1186/s41077-019-0108-7 (PMC6676572; doi:10.1186/s41077-019-0108-7)
Supplement: Supplementary file 4 — Facilitator guide. (DOCX 15 kb) [file 41077_2019_108_MOESM4_ESM.docx]

| **SbCST Facilitator Guide** | | | |
| --- | --- | --- | --- |
| **OVERVIEW**  **Date**:  **Phase/Specialty:**  **Scenario:** | **SIMULATION CENTER STAFF**  **Facilitator:**  **Simulation Technician:** | | |
| | **SCHEDULE** | **Approximate Start Time** | **Timeframe** | | --- | --- | --- | | **Scenario Pre-Brief** |  |  | | **Scenario Time** |  |  | | **Move to Classroom** |  |  | | **Debrief** |  |  | |  | | | | **PARTICIPANT ROLES** | **EMBEDDED PARTICIPANTS** | |
| **OBSERVERS** | |
| **SCENARIO OUTLINE** | **PATIENT BACKGROUND** | | |
| **EQUIPMENT/SUPPLIES** | | **OPTIONAL SYSTEM REPS** |
| **VITAL SIGNS & PATIENT STATUS**   |  |  | | --- | --- | |
| **Floor Map of Clinical Area** | | | |
| **SIMULATION PROCESS TESTING GOALS & NOTES**   | **Overall Design** | **Resource accessibility/workflow efficiency** | | --- | --- | | **Patient Safety** | **Patient and Family Experience** | | **Infection Control** |  |   **SCENARIO**   | **STEP-BY-STEP PROCESS** | **PROCESS BEING TESTED** | **OBSERVATION NOTES** | | --- | --- | --- | |  |  |  | |  |  |  | |  |  |  | |  |  |  | |  |  |  | |  |  |  | | | | |

Appendix C: Facilitator Guide
